# Supplementary material for: Strongly-anharmonic gateless gatemon qubits based on InAs/Al 2D heterostructure
Source: Research Square preprint supplement (doi:10.21203/rs.3.rs-6458300/v1), 2025-05-01
Supplement: Supplementary file 1 [file 45668ffbead06ea2ef905b88.pdf]

# Supplementary Information for strongly-anharmonic gateless gatemon qubits based on InAs/Al 2D heterostructure

Shukai Liu<sup>1</sup>, Arunav Bordoloi<sup>1</sup>, Jacob Issokson<sup>2</sup>, Ido Levy<sup>2</sup>, Maxim Vavilov<sup>3</sup>, Javad Shabani<sup>2</sup>,  
and Vladimir Manucharyan<sup>1,4</sup>

<sup>1</sup>Department of Physics, Joint Quantum Institute, and Quantum Materials Center, University of Maryland, College Park, MD, USA

<sup>2</sup>Center for Quantum Information Physics, Department of Physics, New York University, New York, NY, USA

<sup>3</sup>Department of Physics, University of Wisconsin-Madison, Madison, WI, USA

<sup>4</sup>Institute of Physics, Ecole Polytechnique Federale de Lausanne, Lausanne, Switzerland

## Supplementary Information 1: Experimental setup

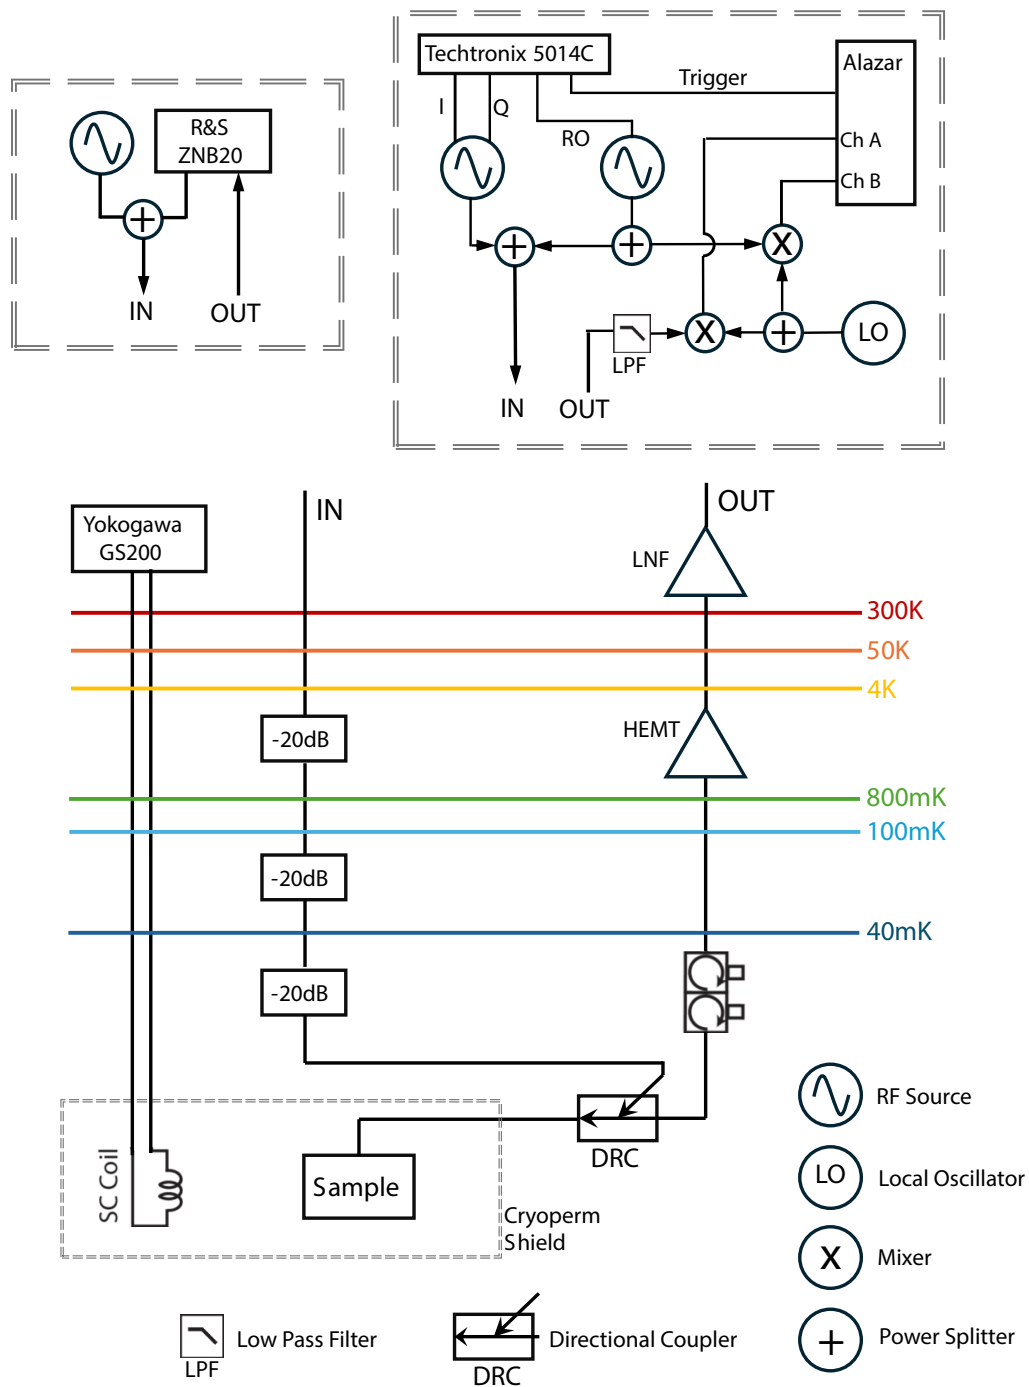

Supplementary Figure 1: Schematics of the experimental setup use for measuring the flux-tunable gatemon qubit.

## Supplementary Information 2: One-Tone Spectroscopy

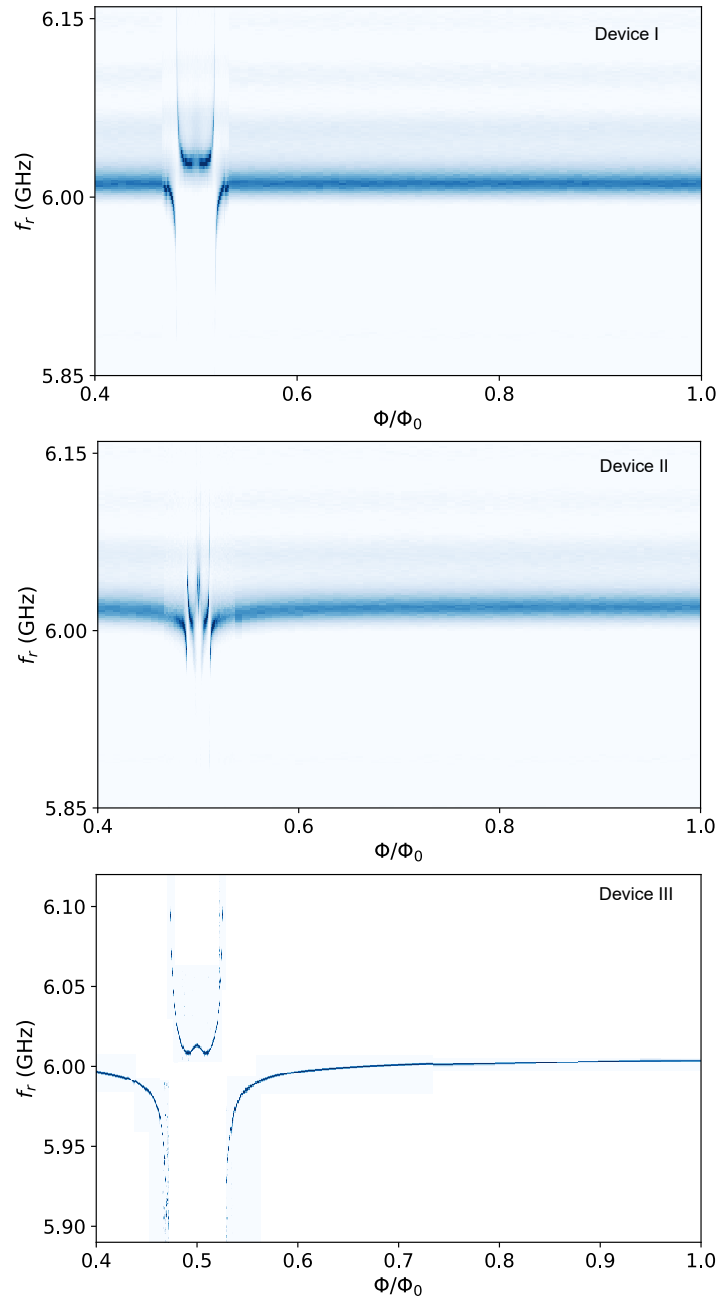

Supplementary Figure 2: One-tone spectroscopy showing  $|S_{11}|$  as a function of the resonator drive frequency  $f_r$  and the applied external magnetic flux  $\Phi/\Phi_0$  for device I, II and III, respectively. The resonator response exhibits a vacuum Rabi splitting with a cavity-qubit coupling strength of  $g = 122$  MHz for device I,  $g = 101$  MHz for device II and  $g = 170$  MHz for device III, respectively.

### Supplementary Information 3: First-order flux insensitivity at $\Phi = 0.5 \Phi_0$

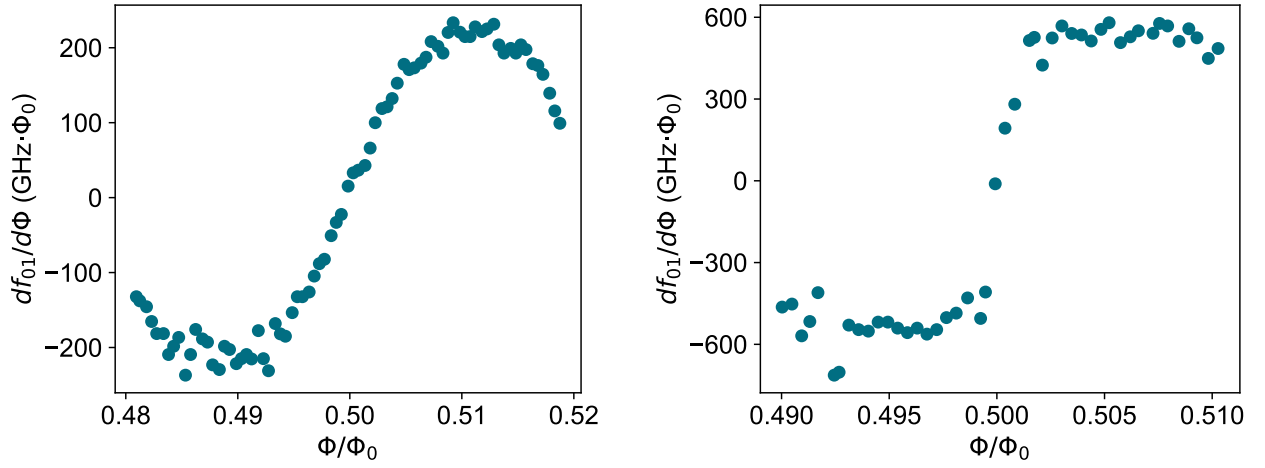

Supplementary Figure 3: Derivative of the  $|0\rangle - |1\rangle$  transition qubit frequency  $df_{01}/d\Phi$  as a function of the applied external magnetic flux  $\Phi/\Phi_0$  for device I (left) and device II (right), indicating a first-order insensitivity to flux at the half-flux quanta  $\Phi = 0.5 \Phi_0$ .

### Supplementary Information 4: Charge-matrix elements

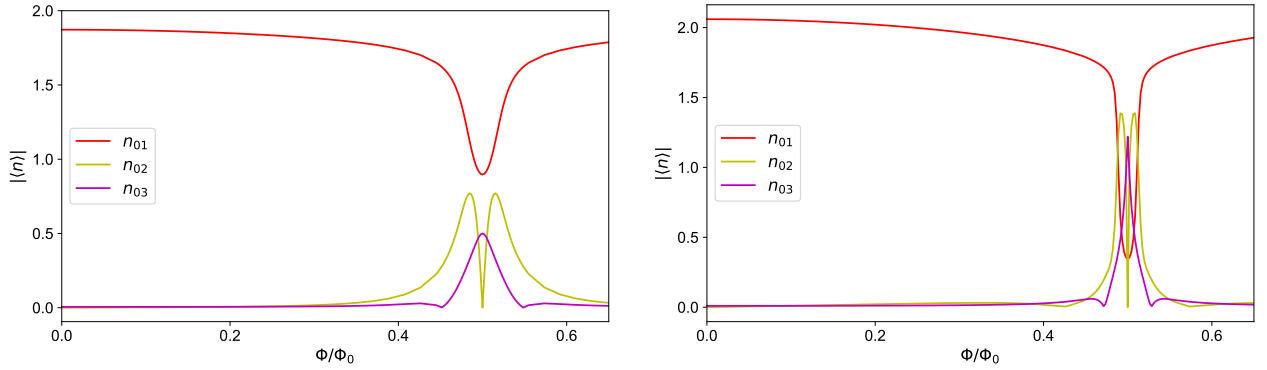

Supplementary Figure 4: Charge matrix elements vs flux  $\Phi/\Phi_0$  for device I (left) and device II (right).

## Supplementary Information 5: Higher-harmonic model comparison

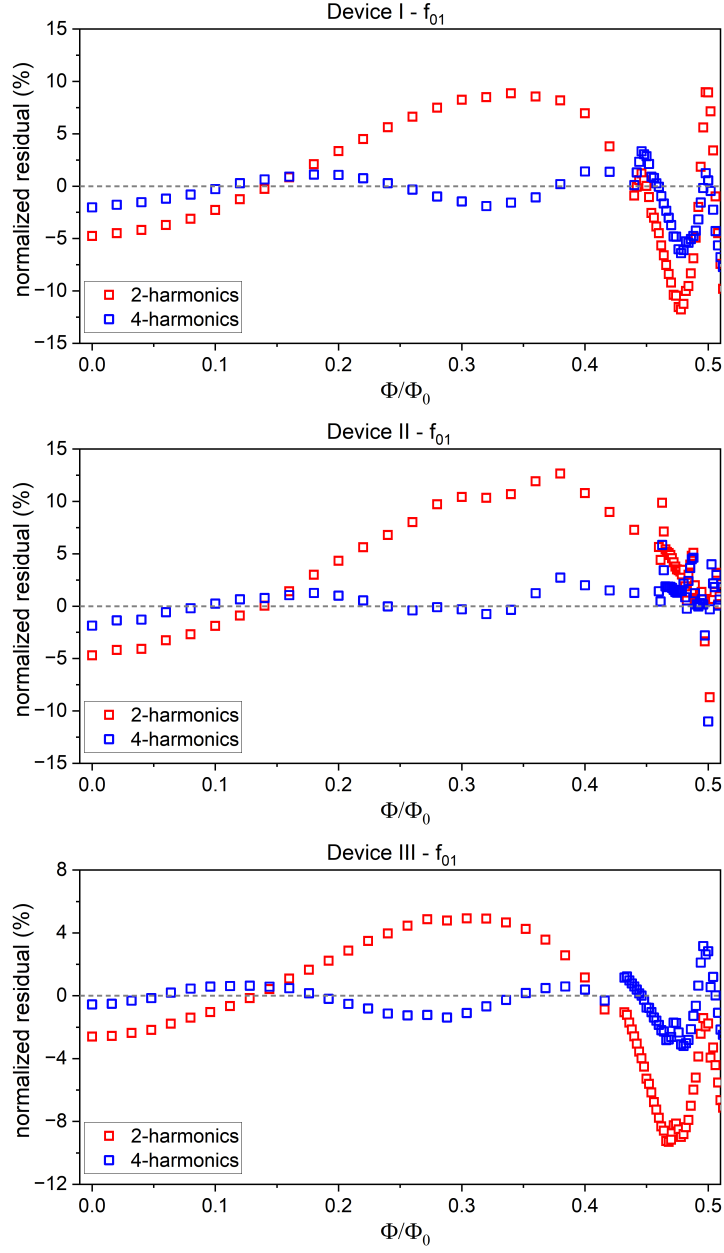

Supplementary Figure 5: Normalized residual  $(f_{\text{model}} - f_{\text{meas}})/f_{\text{meas}}$  as a function of  $\Phi/\Phi_0$  for the  $|0\rangle - |1\rangle$  qubit transition using the higher-harmonic model for device I, II and III, respectively. Here,  $k$  refers to the number of leading Fourier harmonic terms used to approximate the Josephson potential energy in  $U = \sum_k E_J^k \cos(k\varphi)$ .

## Supplementary Information 6: Multi-transparency model

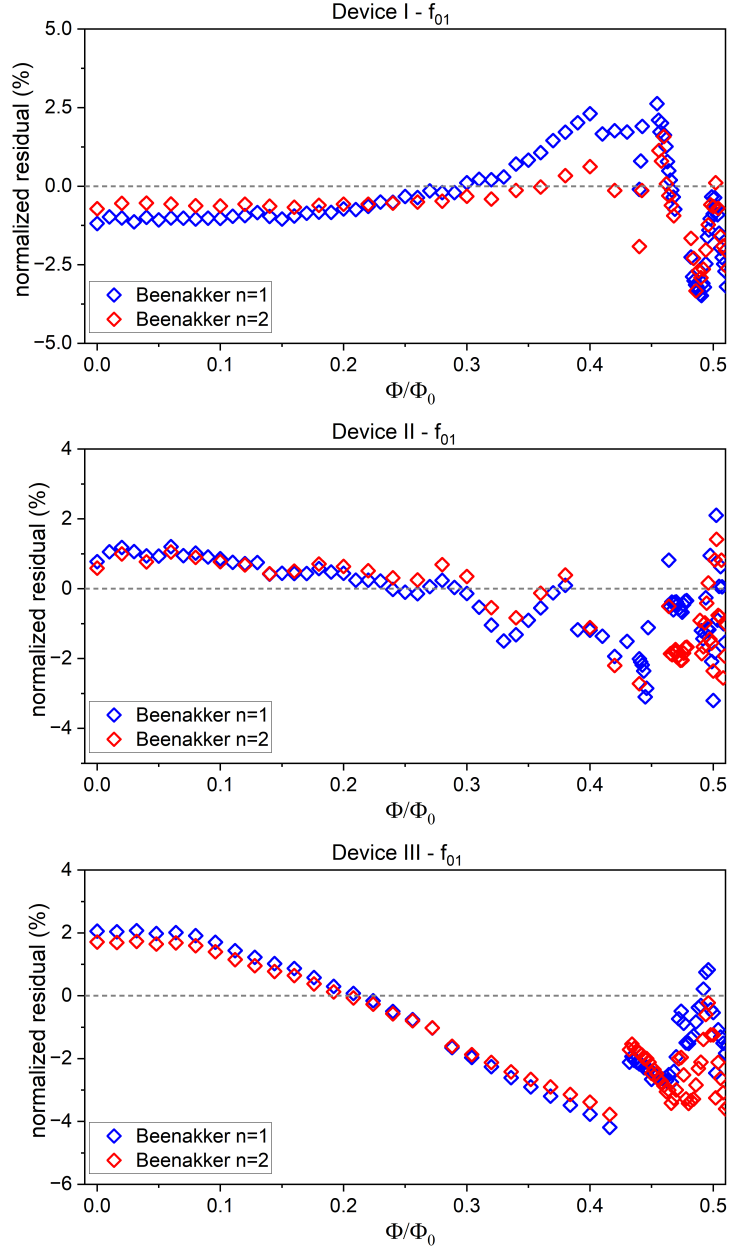

Supplementary Figure 6: Normalized residual  $(f_{\text{model}} - f_{\text{meas}})/f_{\text{meas}}$  as a function of  $\Phi/\Phi_0$  for the  $|0\rangle - |1\rangle$  qubit transition using the single and multiple transparency model for device I, II and III, respectively. Here,  $n$  refers to the number of characteristic channel transparencies for each Josephson junction. We observe that increasing  $n$  from a single ( $n = 1$ ) characteristic channel transparency to two ( $n = 2$ ) channel transparencies does not lead to any significant reduction in the residuals.

Supplementary Information 7:  $T_1$  flux dependence

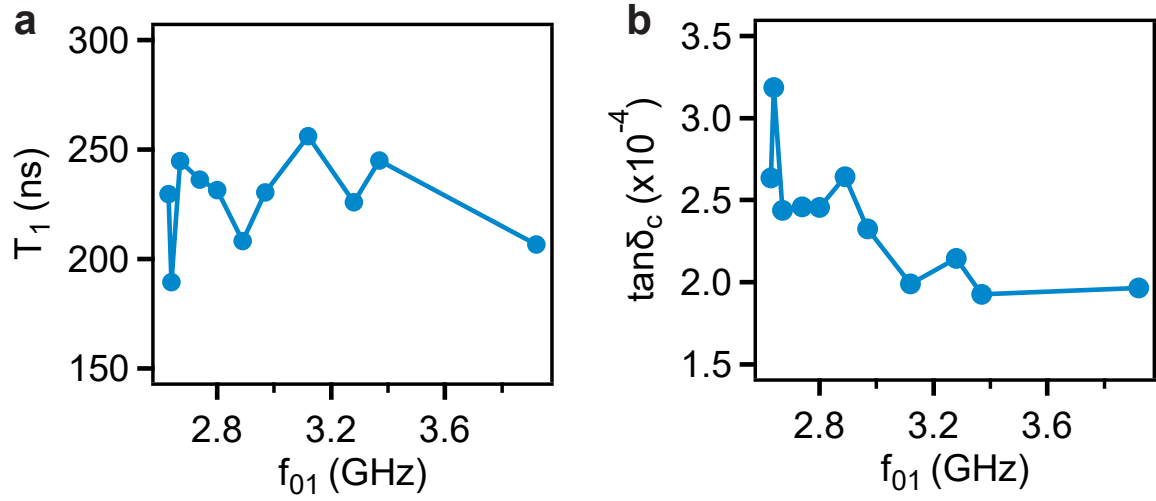

Supplementary Figure 7: **a.**  $T_1$  as a function of the  $|0\rangle - |1\rangle$  transition qubit frequency  $f_{01}$  in the vicinity of half-flux quanta  $\Phi = 0.5 \Phi_0$ . **b.** The effective dielectric loss tangent  $\tan \delta_c$  vs the qubit frequency  $f_{01}$  extracted from (a) using  $\tan \delta_c = \frac{1}{T_1 \omega_{01}}$ , where  $\omega_{01} = 2\pi f_{01}$ .
